# Supplementary material for: Trends in Infectious Keratitis in Taiwan: An Update on Predisposing Factors, Microbiological and Antibiotic Susceptibility Patterns
Source: MDPI journal article supplement (doi:10.3390/diagnostics12092095), 2022-08-29
Supplement: s1 [file s1]

Table S1. Susceptibility of methicillin-resistant *Staphylococcus aureus* (MRSA)

isolates to the tested antibiotics.

|              | 2004-2007  | 2008-2011  | 2012-2015  | 2016-2019  | Total      |          |
|--------------|------------|------------|------------|------------|------------|----------|
| Antibiotics  | n (%)      | P value* |
| Clindamycin  | 19 (5.3)   | 25 (16.0)  | 19 (21.1)  | 19 (36.8)  | 82 (19.5)  | 0.015    |
| Erythromycin | 19 (0.0)   | 25 (4.0)   | 19 (21.1)  | 19 (31.6)  | 82 (13.4)  | 0.001    |
| Fusidic acid | N/A        | 22 (90.9)  | 18 (100.0) | 19 (100.0) | 59 (96.6)  | 0.235    |
| Linezolid    | N/A        | 14 (100.0) | 14 (100.0) | 14 (100.0) | 42 (100.0) |          |
| Smx-tmp      | 19 (79.0)  | 25 (76.0)  | 19 (84.2)  | 19 (100.0) | 82 (100.0) | 0.053    |
| Teicoplanin  | 19 (100.0) | 25 (100.0) | 19 (100.0) | 19 (100.0) | 82 (100.0) |          |
| Tigecycline  | N/A        | 25 (100.0) | 18 (100.0) | 19 (100.0) | 62 (100.0) |          |
| Vancomycin   | 16 (100.0) | 25 (100.0) | 19 (100.0) | 19 (100.0) | 79 (100.0) |          |

\* Cochran-Armitage trend test
